# Supplementary material for: Profiling Non-Coding RNA Levels With Clinical Classifiers in Pediatric Crohn’s Disease
Source: Research Square preprint supplement (doi:10.21203/rs.3.rs-88594/v1), 2020-10-13
Supplement: Supplementary file 7 [file f20d04ba439be3a8d4ee154b.xlsx]

## Sheet: Table S2
Additional File Table S2: Chi-Squares of Patient Clinical Characteristics
Gender (Male vs. Female)
	Ileum	Rectum
OR	0.37 [0.26-0.50]	0.40 [0.29-0.54]
p	1.3e-10	3.9e-10
			Ileum vs Rectum
OR (Male)			0.81 [0.62-1.05]
p (Male)			0.1268
OR (Female)			0.74 [0.52-1.05]
p (Female)			0.09146
Disease Status (Case vs. Controls)
	Ileum	Rectum
OR	14.8 [10.1-22.0]	28.9 [19.4-43.6]
p	2.2e-16	2.2e-16
			Ileum vs Rectum
OR (CD)			0.69 [0.54-0.88]
p (CD)			0.00186
OR (Control)			1.35 [0.81-2.26]
p (Control)			0.2679
Disease Behavior (Montreal)
	Ileum	Rectum
OR (B1 vs B2)	73.2 [40.9-136.9]	35.0 [22.1-57.2]
p (B1 vs B2)	2.2e-16	2.2e-16
OR (B1 vs B3)	267.60 [122.3-646.9]	127.0[68.4-249.4]
p (B1 vs B3)	2.2e-16	2.2e-16
OR (B2 vs B3)	3.60 [1.4-10.3]	3.62 [1.69-7.96]
p (B2 vs B3)	0.0076	0.000502
			Ileum vs Rectum
OR (B1)			0.79 [0.61-1.02]
p (B1)			0.07506
OR (B2)			0.38 [0.18-0.78]
p (B2)			0.3792
OR (B3)			0.38 [0.13-1.04]
p (B3)			0.0621
Disease Inflammation Status
	Ileum	Rectum
OR (Inflamed vs Non)	0.006 [0.0031-0.0122]	1.03 [0.75-1.42]
p (Inflamed vs Non)	2.2e-16	0.8761
OR (L1 vs Non)	6.4 [2.95-14.4]	0.0002 [0.0-0.001]
p (L1 vs Non)	3.2e-08	2.2e-16
OR (L2 vs Non)	7.7 [3.6-17.2]	0.07 [0.04-0.11]
p (L2 vs Non)	7.3e-09	2.2e-16
OR (L3 vs Non)	52.8 [26.7-110.4]	0.55 [0.39-0.78]
p (L3 vs Non)	2.2e-16	0.00056
OR (L1 vs L2)	0.83 [0.47-1.47]	0.003 [0.0002-0.02]
p (L1 vs L2)	0.5846	2.23e-16
OR (L1 vs L3)	0.12 [0.07-0.19]	0.0003 [0.00-0.002]
p (L1 vs L3)	2.2e-16	2.2e-16
OR (L2 vs L3)	0.15[0.09-0.22]	0.13 [0.07-0.21]
p (L2 vs L3)	2.2e-16	2.2e-16
			Ileum vs Rectum
OR (Inflamed)			2.34 [1.75-3.11]
p (Inflamed)			1.69e-09
OR (Non-Inflamed)			0.01 [0.001-0.03]
p (Non-Inflamed)			2.2e-16
OR (L1)			509.7 [73.0-7996.3]
p (L1)			2.2e-16
OR (L2)			1.70 [0.93-3.10]
p (L2)			0.08783
OR (L3)			1.47 [1.03-2.10]
p (L3)			0.0307
